# Supplementary material for: Species interactions constrain adaptation and preserve ecological stability in an experimental microbial community
Source: PubMed Central journal article supplement (PMC9039033; doi:10.1038/s41396-022-01191-1), 2022-01-22

*L. plantarum*

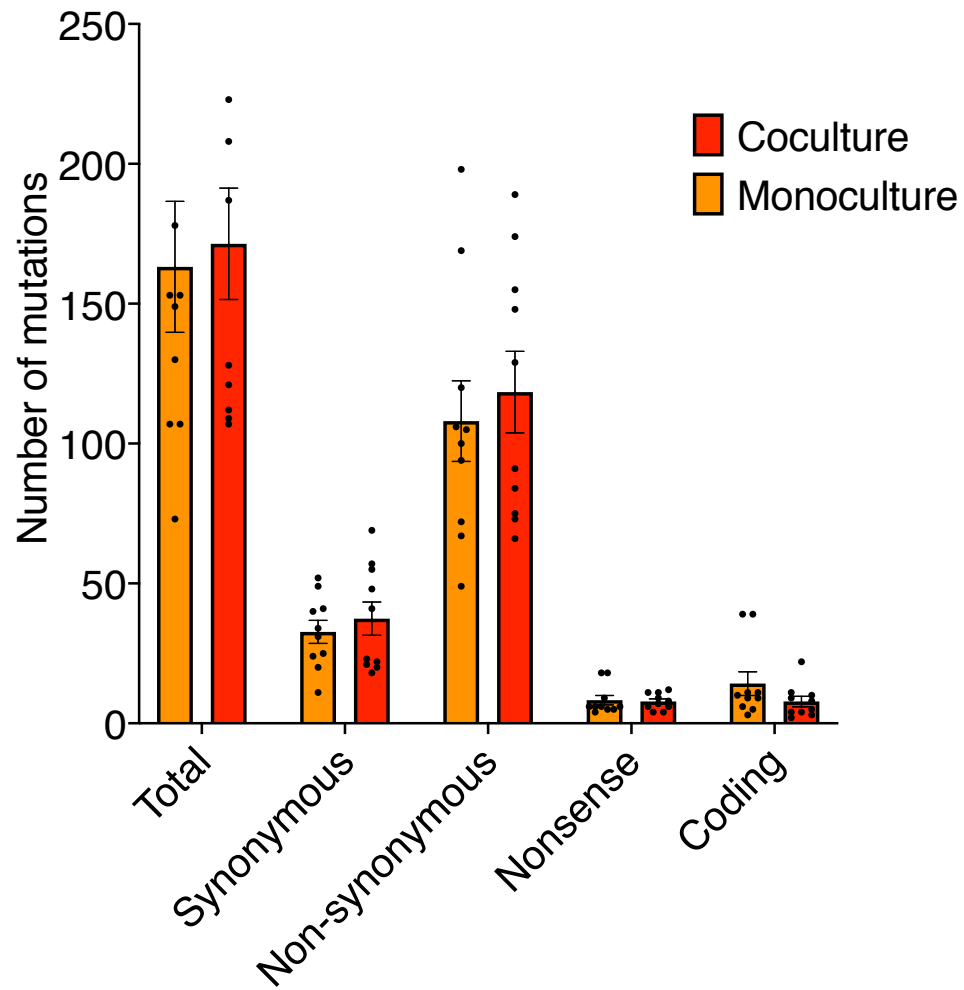

*S. cerevisiae*

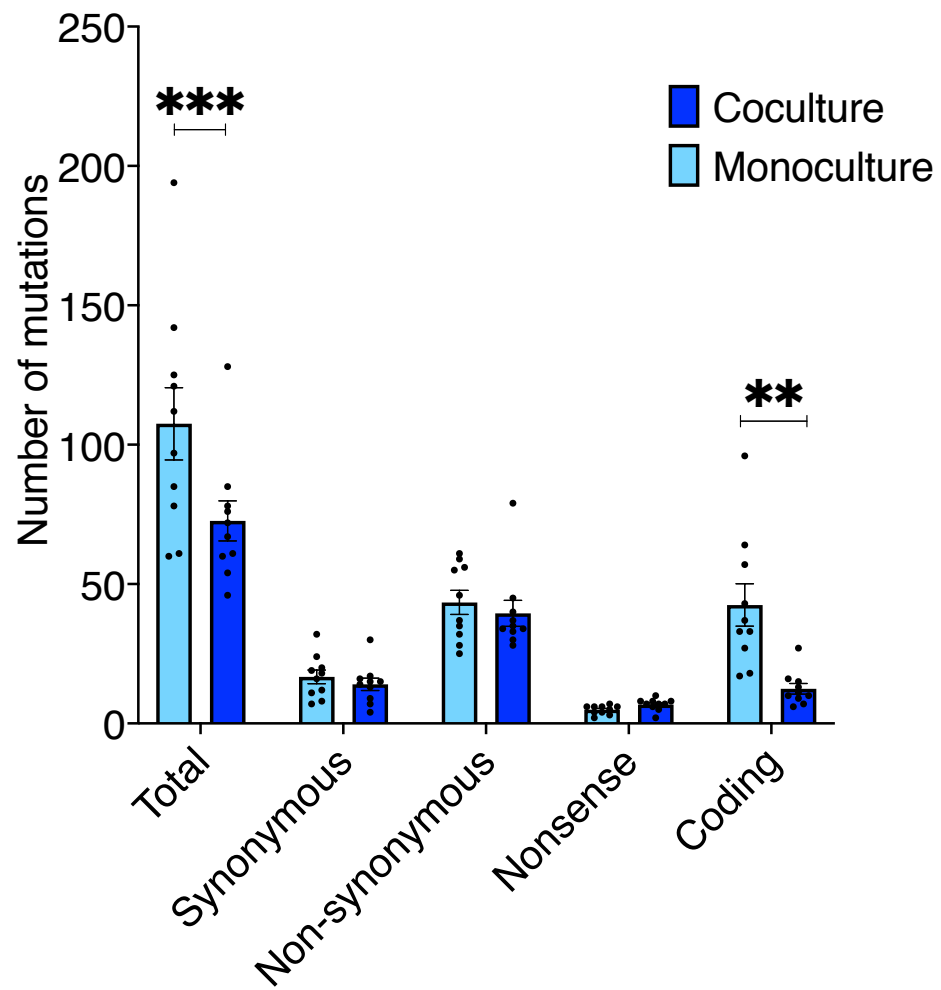

Supplement: 41396_2022_1191_MOESM2_ESM.pdf [file 41396_2022_1191_MOESM2_ESM.pdf]
